# Supplementary material
Source: publisher figshare collection journal article supplement (https://future-science-group.figshare.com/ndownloader/files/33950396)
Supplement: Supplementary file 1 [file 33950396]

Table S1 Akaike information criterion test（AIC）

| **Distribution** | **Docetaxel** | | **Nivolumab** | | **Pembrolizumab** | | **Atezolizumab** | |
| --- | --- | --- | --- | --- | --- | --- | --- | --- |
| OS  Curve | PFS  Curve | OS  Curve | PFS  Curve | OS  Curve | PFS  Curve | OS  Curve | PFS  Curve |
| Exponential | 5930.51 | 5289.25 | 2123.08 | 2010.34 | 1340.35 | 1545.21 | 2155.45 | 2154.62 |
| Weibull | 5901.18 | 5186.87 | 2125.07 | 2002.72 | 1341.06 | 1547.21 | 2155.24 | 2149.88 |
| Gompertz | 5925.76 | 5277.34 | 2122.88 | 1958.50 | 1342.32 | 1530.01 | 2157.43 | 2097.07 |
| Log-normal | 5913.27 | 5071.58 | **2106.52** | **1925.91** | 1344.61 | **1491.29** | **2149.33** | **2028.59** |
| Log logistic | **5884.05** | **5068.94** | 2113.99 | 1927.08 | **1339.74** | 1492.81 | 2149.74 | 2040.11 |
| Gamma | 5893.31 | 5139.14 | 2124.73 | 2010.44 | 1340.66 | 1544.82 | 2154.06 | 2156.45 |
